# Supplementary material for: Influence of polymer flexibility on nanoparticle dynamics in semidilute solutions
Source: Royal Society of Chemistry journal article supplement (doi:10.1039/c8sm01834k), 2018-11-08
Supplement: c8sm01834k1.pdf [file c8sm01834k1.pdf]

### Influence of polymer flexibility on nanoparticle dynamics in semidilute solutions

Renjie Chen,<sup>a</sup> Ryan Poling-Skutvik,<sup>a</sup> Michael P. Howard,<sup>b</sup> Arash Nikoubashman,<sup>c</sup> Sergei A. Egorov,<sup>d,e</sup> Jacinta C. Conrad,<sup>a</sup> and Jeremy C. Palmer<sup>a\*</sup>

#### Calculation of Zero-Shear Viscosity

As discussed in the main text, the zero-shear viscosities  $\eta_0$  of the polymer solutions from simulation were used as input parameters in Stokes-Einstein relation and mode-coupling theory calculations of the long-time nanoparticle diffusivity  $D$  (Figs. 4 and 5 in the main text). Estimates of  $\eta_0$  were obtained from reverse nonequilibrium molecular dynamics (RNEMD) simulations<sup>1,2</sup> performed using HOOMD-blue with molecular dynamics<sup>3–5</sup> and multi-particle collision dynamics<sup>6</sup> accelerated on graphics processing units. Stress was imposed on the solutions by generating a momentum flux, and the shear rate  $\dot{\gamma}$  was extracted from the emerging flow profile, as described in ref. 1. For the fully flexible chains ( $\kappa = 0$ ), the linear response regime can be directly accessed in simulation to compute  $\eta_0$ . As the stiffness parameter  $\kappa$  was increased, however, the polymer relaxation slowed down significantly, making a direct measurement of  $\eta_0$  computationally infeasible. Thus, we extracted  $\eta_0$  by fitting our data to the Cross model,<sup>2,7,8</sup>

$$\eta(\dot{\gamma}) = \eta_{\infty} + \frac{\eta_0 - \eta_{\infty}}{1 + (\tau_s \dot{\gamma})^m}, \quad (\text{S1})$$

where  $\eta_{\infty}$  is the asymptotic viscosity as  $\dot{\gamma} \rightarrow \infty$ ,  $\tau_s$  is the characteristic time for the onset of shear thinning, and  $m$  is a parameter sensitive to the degree of shear thinning ( $m = 0$  for Newtonian liquids;  $m \rightarrow 1$  for increasingly shear thinning fluids). The fit parameters obtained from this analysis are reported in Table S1. Uncertainties in  $\eta_0$  were estimated from the error in the fits to eqn. S1. These uncertainties were propagated using standard relationships to estimate errors in other quantities calculated from  $\eta_0$ , such as  $D_{\text{SER}}$  reported in Fig. 4 of the main text.

The Cross model provided excellent fits to the RNEMD sim-

ulation data in each case, independent of the polymer stiffness and concentration (Fig. S1). Further, for fully flexible polymers ( $\kappa = 0$ ), the values of  $\eta_0$  extracted using eqn. S1 were found to be in excellent agreement with estimates obtained from standard linear response analysis. Analysis of  $\eta_0$  reveals that it is a strong function of polymer stiffness and concentration, varying by as much as an order of magnitude over the range of conditions and parameters examined in our study (Fig. S2). These findings are consistent with our recent simulation study examining the dynamics and shear rheology of semiflexible polymers in solution using similar polymer models and computational methods;<sup>2</sup> we refer interested readers to this study for in-depth discussion of the influence of polymer stiffness and concentration on these solution properties.

**Table S1** Parameters obtained from fitting to the Cross model

| $c$  | $\kappa$ | $\eta_0$ | $\tau_s$  | $m$      |
|------|----------|----------|-----------|----------|
| 0.05 | 0        | 5.6 (1)  | 270 (4)   | 1.00 (1) |
| 0.05 | 5        | 8.2 (2)  | 750 (3)   | 0.94 (3) |
| 0.05 | 10       | 11.2 (4) | 1900 (2)  | 0.81 (8) |
| 0.05 | 20       | 14 (1)   | 3700 (5)  | 0.73 (8) |
| 0.05 | 32       | 17 (3)   | 6000 (2)  | 0.65 (8) |
| 0.20 | 0        | 13.4 (4) | 380 (4)   | 1.00 (1) |
| 0.20 | 5        | 38 (2)   | 1900 (2)  | 1.00 (1) |
| 0.20 | 10       | 74 (4)   | 6300 (7)  | 0.95 (3) |
| 0.20 | 20       | 130 (1)  | 19000 (3) | 0.77 (5) |
| 0.20 | 32       | 170 (1)  | 40000 (1) | 0.78 (8) |

Notes: Numbers in parentheses denote uncertainty in last significant digit.

#### References

- 1 F. Müller-Plathe, *Phys. Rev. E*, 1999, **59**, 4894.
- 2 A. Nikoubashman and M. P. Howard, *Macromolecules*, 2017, **50**, 8279–8289.
- 3 J. A. Anderson, C. D. Lorenz and A. Travesset, *J. Comput. Phys.*, 2008, **227**, 5342–5359.
- 4 J. Glaser, T. D. Nguyen, J. A. Anderson, P. Lui, F. Spiga, J. A. Millan, D. C. Morse and S. C. Glotzer, *Comput. Phys. Commun.*, 2015, **192**, 97–107.
- 5 M. P. Howard, J. A. Anderson, A. Nikoubashman, S. C. Glotzer and A. Z. Panagiotopoulos, *Comput. Phys. Commun.*, 2016, **203**, 45–52.

<sup>a</sup> Department of Chemical and Biomolecular Engineering, University of Houston, Houston, TX 77204

<sup>b</sup> McKetta Department of Chemical Engineering, University of Texas at Austin, Austin, TX 78712

<sup>c</sup> Institute of Physics, Johannes Gutenberg University Mainz, Staudingerweg 7, 55128 Mainz, Germany

<sup>d</sup> Department of Chemistry, University of Virginia, Charlottesville, Virginia 22901

<sup>e</sup> Leibniz Inst Polymer Res Dresden, Hohe Strasse 6, D-01069 Dresden, Germany

\* E-mail: jcpalmer@uh.edu

- 6 M. P. Howard, A. Z. Panagiotopoulos and A. Nikoubashman, *Comput. Phys. Commun.*, 2018, **230**, 10–20.
- 7 D. M. Meter and R. B. Bird, *AIChE J.*, 1964, **10**, 878.
- 8 A. Rao, *Rheology of Fluid, Semisolid, and Solid Foods*, Springer US, 3rd edn., 2014.

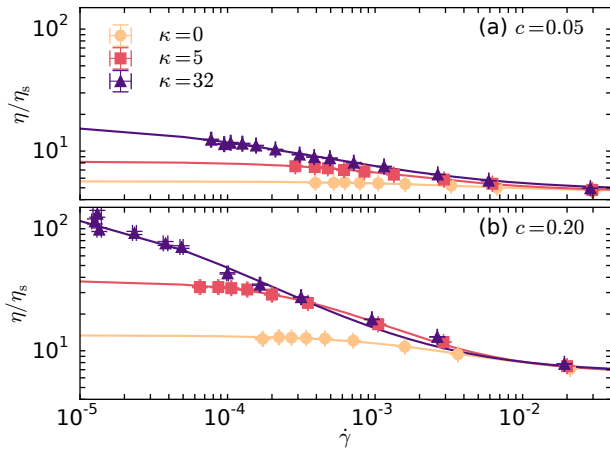

**Fig. S1** Reduced viscosity  $\eta/\eta_s$  as a function of shear rate  $\dot{\gamma}$  for solutions of polymers with stiffness  $\kappa = 0$  ( $\circ$ ), 5 ( $\square$ ), and 32 ( $\triangle$ ) at monomer concentration (a)  $c = 0.05$  and (b)  $c = 0.20$ . The dynamic viscosity of the background MPCD solvent is  $\eta_s \approx 4.0$ . Symbols are data from RNEMD simulations, whereas solid lines are fit using the Cross model (eqn. S1)

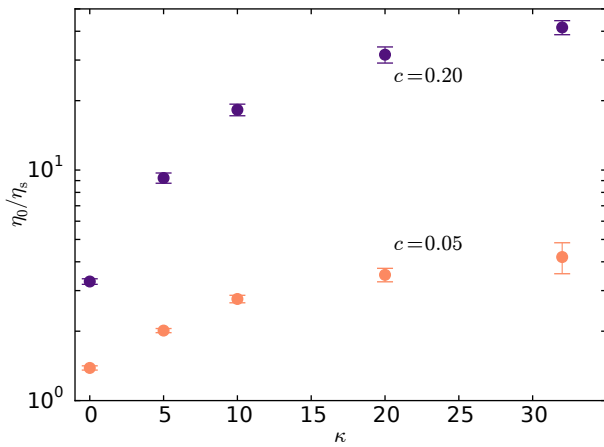

**Fig. S2** Reduced zero-shear viscosity  $\eta_0/\eta_s$  as a function of chain stiffness  $\kappa$  for monomer concentration  $c = 0.05$  (orange) and  $c = 0.20$  (purple). The dynamic viscosity of the background MPCD solvent is  $\eta_s \approx 4.0$ . For each case,  $\eta_0$  was estimated by fitting RNEMD simulation data to the Cross model (eqn. S1).
